# Supplementary material for: Regulation of DNA replication initiation by ParA is independent of parS location in Bacillus subtilis
Source: PubMed Central journal article supplement (PMC7614844; doi:10.1099/mic.0.001259), 2022-10-01
Supplement: EMS179175-supplement-Supplementary_material.pdf [file EMS179175-supplement-Supplementary_material.pdf]

## **SI EXPERIMENTAL PROCEDURES**

**Table S1.** Strains used in this study

**Table S2.** Plasmids used in this study

**Table S3.** Oligonucleotides used in this study

**Table S4.** Strains used in each figure

**Regulation of DNA replication initiation by ParA is independent of *parS* location in *Bacillus subtilis***

**Supplementary material**

CONFIDENTIAL

## Supplementary Figures

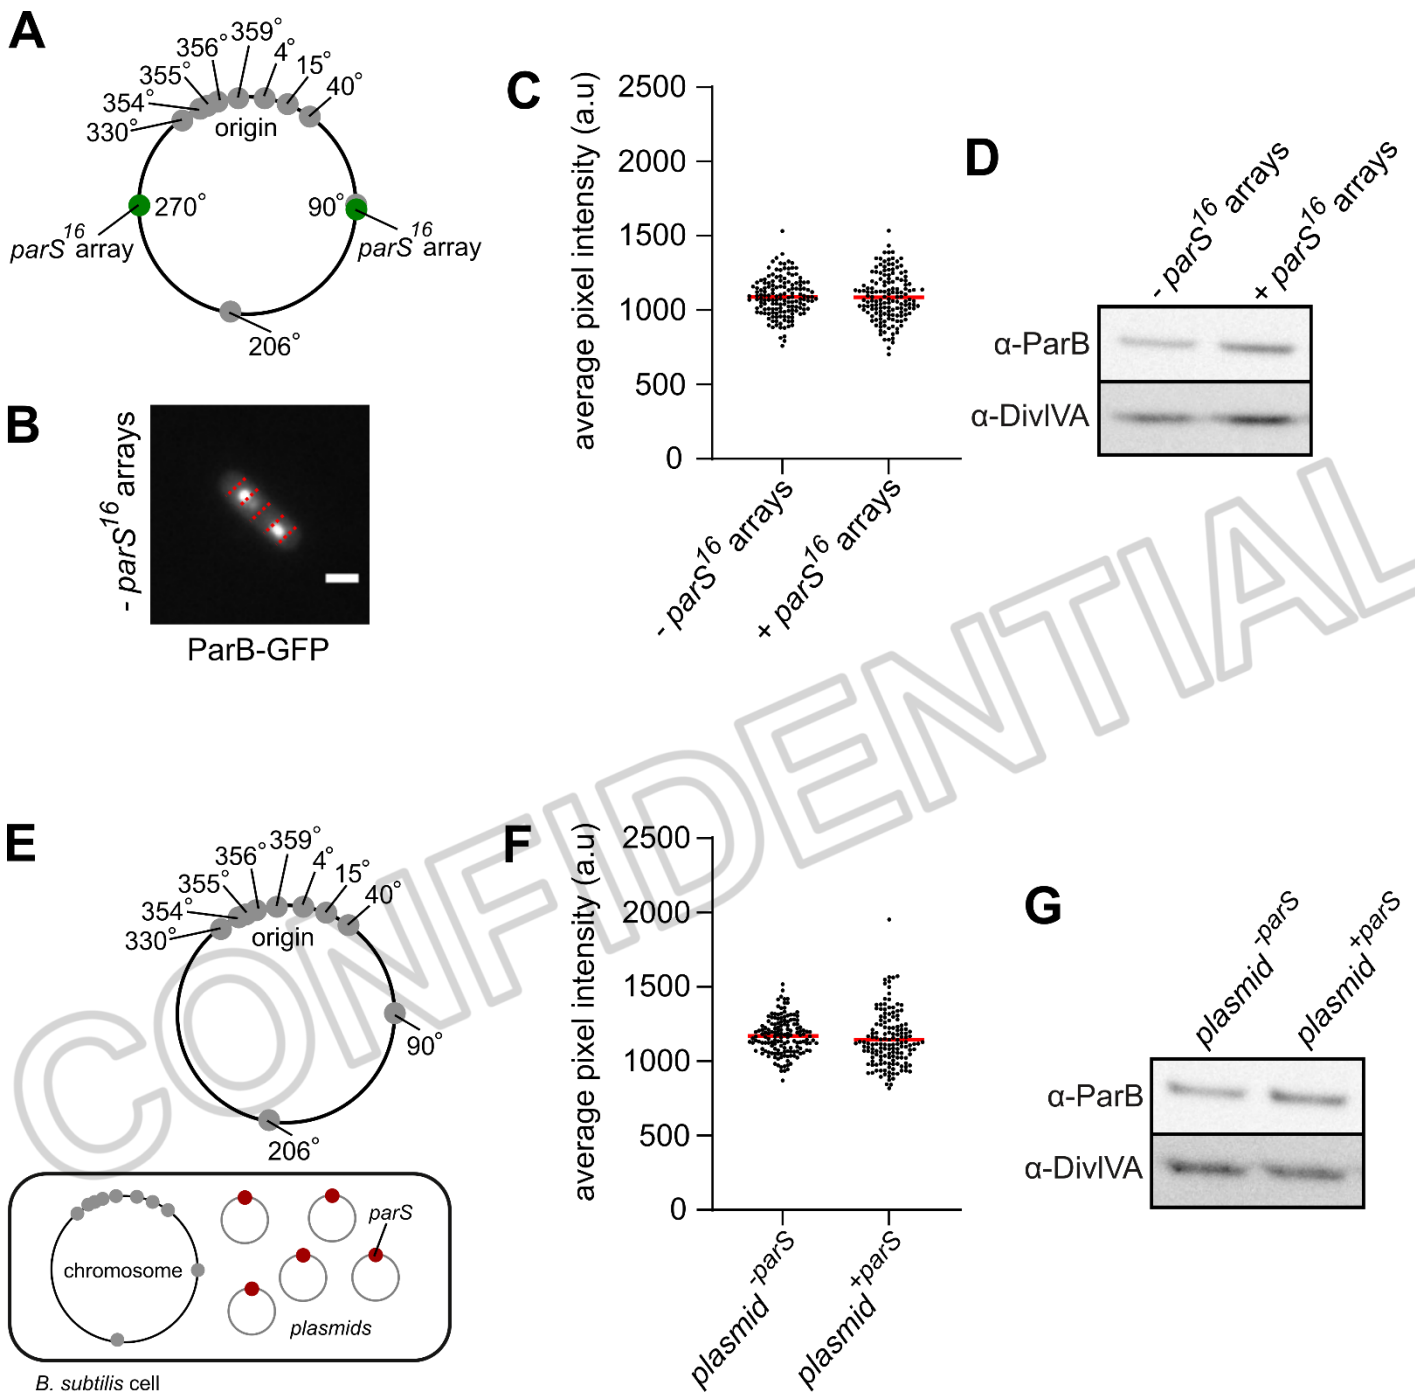

**Figure S1: Intracellular level of ParB remains unchanged in cells harbouring extra *parS* sites.** **(A)** Schematic diagram showing the location of *B. subtilis* endogenous chromosomal *parS* (grey circles) and the *parS*<sup>16</sup> arrays (green circles). **(B)** Fluorescent image of a representative cell used for the intensity profile plot. Dotted lines represent the area measured to generate the intensity profile of individual cells. Scale bar, 1  $\mu\text{m}$ . **(C)** The average fluorescent intensity for ParB-

GFP in strains containing chromosomal *parS*<sup>16</sup> arrays was measured for 150 individual cells. P-value of 0.9462. **(D)** Intracellular ParB level in strains containing chromosomal *parS*<sup>16</sup> arrays was detected by immunoblot using an  $\alpha$ -ParB antibody (top panel) and  $\alpha$ -DivIVA antibody as a loading control (bottom panel). **(E)** Schematic diagram showing the location of *B. subtilis* endogenous chromosomal *parS* (grey circles) and plasmid containing a single *parS* (red circles). **(F)** The average fluorescent intensity for ParB-GFP in strains containing extrachromosomal *parS* was measured for 150 individual cells. P-value of 0.1377. **(G)** Intracellular ParB level in strains containing extrachromosomal *parS* was detected by Western blot using an  $\alpha$ -ParB antibody (top panel) and  $\alpha$ -DivIVA antibody as a loading control (bottom panel).

CONFIDENTIAL

*parS* mutants

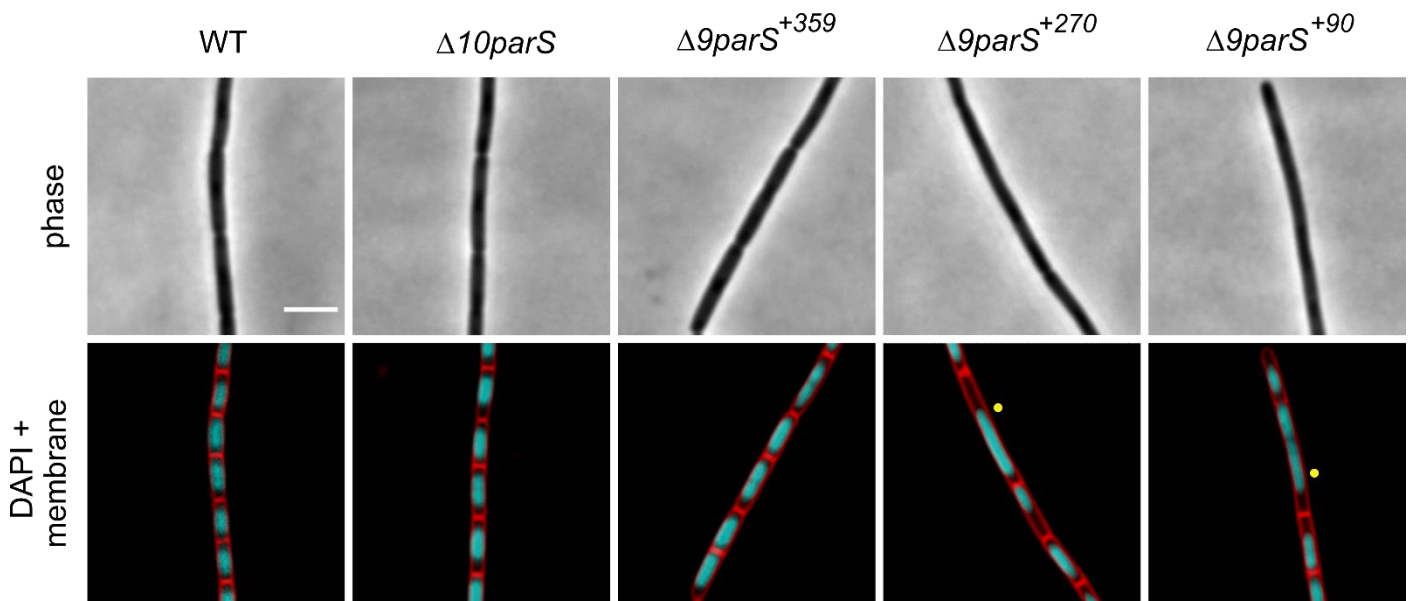

**Figure S2: Chromosome organization was disrupted when *parS* was located away from the origin.** DAPI staining of chromosomal DNA in strains that differ in the location of *parS*. Phase

contrast (top panel) and membrane dye FM 5-95 combined with DNA stain DAPI (bottom panel).

Scale bar, 3 $\mu$ m.

CONFIDENTIAL

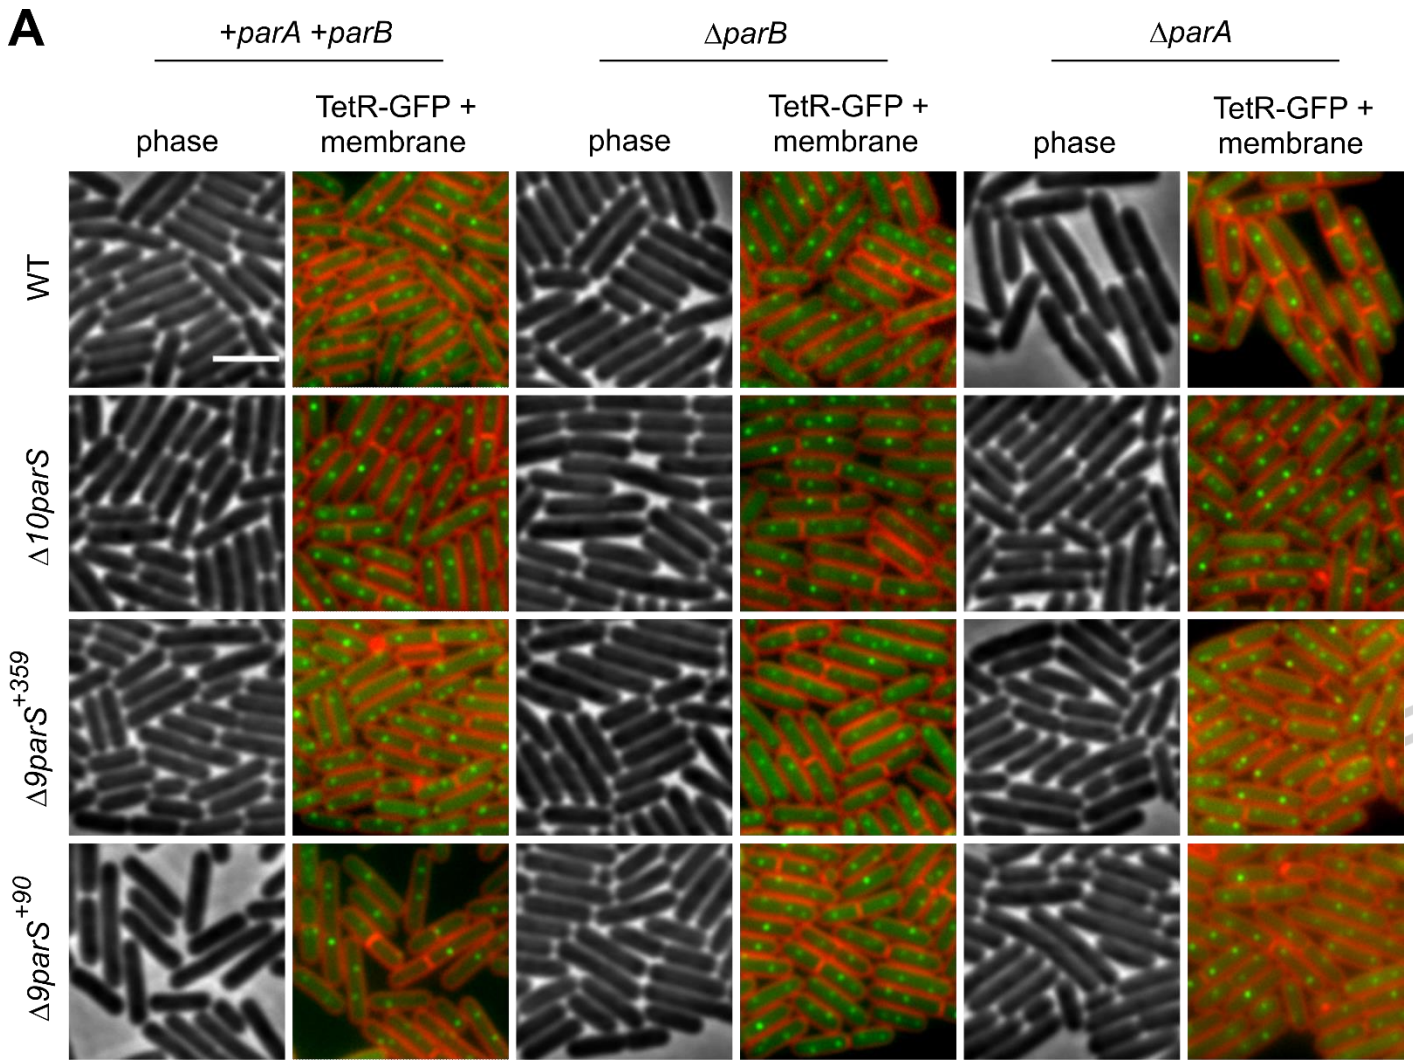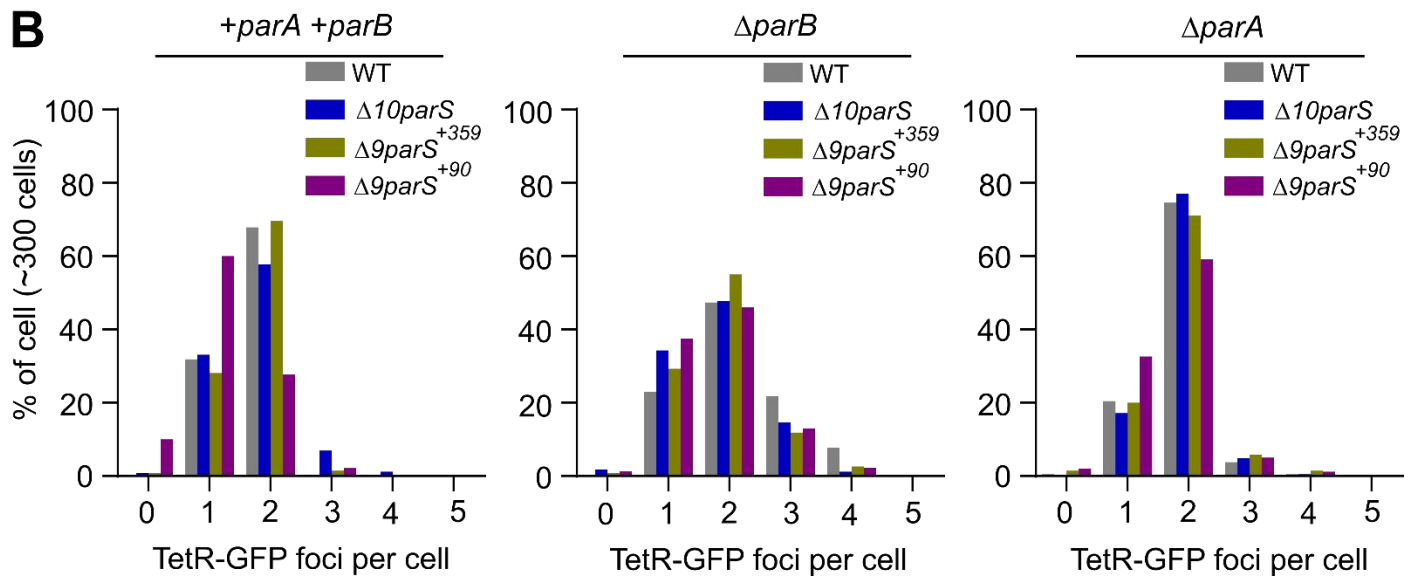

**Figure S3: A single *parS* redistribute ParB to disrupt chromosome origin segregation. (A)**

Origin localization in a wild-type strain and strains that differ in the location of *parS*. The *oriC*

region was labelled using an array of *tetO* operators bound by TetR-GFP. Phase contrast (left panel), and membrane dye FM 5-95 combined with TetR-GFP (right panel). **(B)** ParB dependent decrease when *parS* was located away from the origin. Scale bar, 3 $\mu$ m.

CONFIDENTIAL

## Supplementary Table 1: Strains used in this study

| Strains                        | Genotype <sup>a</sup>                                                                    | Construction <sup>b</sup>   | Source    |
|--------------------------------|------------------------------------------------------------------------------------------|-----------------------------|-----------|
| <i>B. subtilis</i> 168CA       | <i>trpC2</i> wild type                                                                   | -                           | [1]       |
| <i>B. subtilis</i> 168CA AK47  | <i>trpC2 tetR-gfp(spc)/tetO<sup>-7</sup>(ery)</i>                                        | -                           | [2]       |
| <i>B. subtilis</i> 168CA AK83  | <i>trpC2 cotS::parS<sup>16</sup> array cat</i>                                           | PSL23 → 168CA               | this work |
| <i>B. subtilis</i> 168CA AK87  | <i>trpC2 parA-parB::neo tetR-gfp/tetO<sup>-7</sup> parS<sup>16</sup> arrays</i>          | AK83 → AK99                 | this work |
| <i>B. subtilis</i> 168CA AK89  | <i>trpC2 ΔparA::neo tetR-gfp/tetO<sup>-7</sup> parS<sup>16</sup> arrays</i>              | HM766 → AK97                | this work |
| <i>B. subtilis</i> 168CA AK91  | <i>trpC2 yheH::parS<sup>16</sup> array cat</i>                                           | PSL25 → 168CA               | this work |
| <i>B. subtilis</i> 168CA AK93  | <i>trpC2 yheH::parS<sup>16</sup> array tet</i>                                           | pcat::tet → AK91            | this work |
| <i>B. subtilis</i> 168CA AK95  | <i>trpC2 tetR-gfp/tetO<sup>-7</sup> yheH::parS<sup>16</sup> array tet</i>                | AK93 → AK47                 | this work |
| <i>B. subtilis</i> 168CA AK97  | <i>trpC2 tetR-gfp/tetO<sup>-7</sup> parS<sup>16</sup> arrays</i>                         | AK83 → AK95                 | this work |
| <i>B. subtilis</i> 168CA AK99  | <i>trpC2 parA-parB::neo tetR-gfp/tetO<sup>-7</sup> yheH::parS<sup>16</sup> array tet</i> | HM765 → AK95                | this work |
| <i>B. subtilis</i> 168CA AK123 | <i>trpC2 ΔparB::neo tetR-gfp/tetO<sup>-7</sup> parS<sup>16</sup> arrays</i>              | HM907 → AK97                | this work |
| <i>B. subtilis</i> 168CA AK150 | <i>trpC2 parS<sup>16</sup> arrays</i>                                                    | AK83 → AK93                 | this work |
| <i>B. subtilis</i> 168CA AK153 | <i>trpC2 parB-gfp::neo parS<sup>16</sup> arrays</i>                                      | HM756 → AK150               | this work |
| <i>B. subtilis</i> PY79 AK169  | <i>tetR-gfp/tetO<sup>-7</sup></i>                                                        | BKM865 → BKM918             | this work |
| <i>B. subtilis</i> PY79 AK171  | <i>Δ8parS tetR-gfp/tetO<sup>-7</sup></i>                                                 | AK47 <sup>c</sup> → BNS1657 | this work |
| <i>B. subtilis</i> PY79 AK177  | <i>Δ8parS parA-parB::neo tetR-gfp/tetO<sup>-7</sup></i>                                  | pHM142 → AK171              | this work |
| <i>B. subtilis</i> PY79 AK179  | <i>Δ8parS ΔparB::neo tetR-gfp/tetO<sup>-7</sup></i>                                      | pHM456 → AK171              | this work |
| <i>B. subtilis</i> PY79 AK181  | <i>parA-parB::neo tetR-gfp/tetO<sup>-7</sup></i>                                         | pHM48 → AK169               | this work |
| <i>B. subtilis</i> PY79 AK183  | <i>ΔparB::neo tetR-gfp/tetO<sup>-7</sup></i>                                             | HM907 → AK169               | this work |
| <i>B. subtilis</i> PY79 AK187  | <i>ΔparA::neo tetR-gfp/tetO<sup>-7</sup></i>                                             | pAK98 → AK169               | this work |
| <i>B. subtilis</i> 168CA AK199 | <i>trpC2 gfp-parA::neo parS<sup>16</sup> arrays</i>                                      | HM740 → AK150               | this work |
| <i>B. subtilis</i> PY79 AK205  | <i>Δ9parS (native parS<sup>90</sup>)</i>                                                 | -                           | [3]       |
| <i>B. subtilis</i> PY79 AK207  | <i>Δ9parS parA-parB::neo tetR-gfp/tetO<sup>-7</sup></i>                                  | pAK09 → AK177               | this work |
| <i>B. subtilis</i> PY79 AK209  | <i>Δ9parS ΔparB::neo tetR-gfp/tetO<sup>-7</sup></i>                                      | pAK09 → AK179               | this work |
| <i>B. subtilis</i> PY79 AK213  | <i>Δ9parS (native parS<sup>206</sup>)</i>                                                | pAK23 → BNS1657             | this work |
| <i>B. subtilis</i> PY79 AK215  | <i>Δ10parS</i>                                                                           | -                           | [3]       |
| <i>B. subtilis</i> PY79 AK225  | <i>Δ10parS parA-parB::neo tetR-gfp/tetO<sup>-7</sup></i>                                 | pAK23 → AK207               | this work |
| <i>B. subtilis</i> PY79 AK227  | <i>Δ10parS ΔparB::neo tetR-gfp/tetO<sup>-7</sup></i>                                     | pAK23 → AK209               | this work |
| <i>B. subtilis</i> PY79 AK239  | <i>parA-parB::neo</i>                                                                    | pAK26 → PY79                | this work |
| <i>B. subtilis</i> PY79 AK241  | <i>ΔparB::neo</i>                                                                        | -                           | [3]       |
| <i>B. subtilis</i> PY79 AK243  | <i>Δ10parS parA-parB::neo</i>                                                            | -                           | [3]       |
| <i>B. subtilis</i> PY79 AK245  | <i>Δ10parS ΔparB::neo</i>                                                                | pAK30 → AK215               | this work |
| <i>B. subtilis</i> PY79 AK259  | <i>Δ9parS<sup>+359</sup> parA-parB::neo</i>                                              | pAK26 → AK215               | this work |
| <i>B. subtilis</i> PY79 AK261  | <i>Δ9parS<sup>+359</sup> ΔparB::neo</i>                                                  | pAK28 → AK215               | this work |
| <i>B. subtilis</i> PY79 AK277  | <i>gfp-parA::neo</i>                                                                     | pHM23 → PY79                | this work |
| <i>B. subtilis</i> PY79 AK281  | <i>Δ10parS gfp-parA::neo</i>                                                             | pAK48 → AK215               | this work |



|                                |                                                                                    |                |           |
|--------------------------------|------------------------------------------------------------------------------------|----------------|-----------|
| <i>B. subtilis</i> PY79 AK305  | $\Delta 9parS^{+359} gfp-parA::neo$                                                | pHM23 → AK215  | this work |
| <i>B. subtilis</i> PY79 AK315  | $\Delta 9parS^{+90}$                                                               | pAK56 → AK205  | this work |
| <i>B. subtilis</i> PY79 AK323  | $\Delta 9parS^{+90} parA-parB::neo$                                                | pAK32 → AK315  | this work |
| <i>B. subtilis</i> PY79 AK325  | $\Delta 9parS^{+90} \Delta parB::neo$                                              | pAK30 → AK315  | this work |
| <i>B. subtilis</i> PY79 AK367  | <i>parB-gfp::neo</i>                                                               | pAK82 → PY79   | this work |
| <i>B. subtilis</i> PY79 AK369  | $\Delta 10parS parB-gfp::neo$                                                      | pAK83 → AK215  | this work |
| <i>B. subtilis</i> PY79 AK373  | $\Delta 9parS^{+90} parB-gfp::neo$                                                 | pAK83 → AK315  | this work |
| <i>B. subtilis</i> PY79 AK399  | $\Delta 9parS^{+90} gfp-parA::neo$                                                 | pAK48 → AK315  | this work |
| <i>B. subtilis</i> PY79 AK405  | $\Delta 9parS^{+90} tetR-gfp/tetO^{-7}$                                            | pAK56 → AK207  | this work |
| <i>B. subtilis</i> PY79 AK519  | $\Delta 9parS tetR-gfp/tetO^{-7}$                                                  | pAK23 → AK171  | this work |
| <i>B. subtilis</i> PY79 AK521  | $\Delta 10parS tetR-gfp/tetO^{-7}$                                                 | pAK09 → AK519  | this work |
| <i>B. subtilis</i> 168CA AK547 | <i>trpC2 Δspo0J gfp-parA::neo</i>                                                  | HM13 → 168CA   | this work |
| <i>B. subtilis</i> PY79 AK553  | $\Delta 9parS^{+90} \Delta (parA-parB)::neo$                                       | pAK100 → AK315 | this work |
| <i>B. subtilis</i> PY79 AK555  | $\Delta 9parS^{+90} \Delta parA::neo$                                              | pAK101 → AK315 | this work |
| <i>B. subtilis</i> PY79 AK557  | <i>ΔparA::neo</i>                                                                  | pAK98 → PY79   | this work |
| <i>B. subtilis</i> PY79 AK559  | $\Delta (parA-parB)::neo$                                                          | pAK99 → PY79   | this work |
| <i>B. subtilis</i> PY79 AK561  | $\Delta 9parS^{+359} \Delta (parA-parB)::neo$                                      | pAK99 → AK215  | this work |
| <i>B. subtilis</i> PY79 AK563  | $\Delta 10parS \Delta (parA-parB)::neo$                                            | pAK100 → AK215 | this work |
| <i>B. subtilis</i> 168CA AK569 | <i>trpC2 Δspo0J gfp-soj::neo plasmid<sup>+parS</sup></i>                           | pHM430 → AK547 | this work |
| <i>B. subtilis</i> 168CA AK571 | <i>trpC2 Δspo0J gfp-soj::neo plasmid<sup>+parS</sup></i>                           | pHM432 → AK547 | this work |
| <i>B. subtilis</i> 168CA AK573 | <i>trpC2 Δ(parA-parB) tetR-gfp/tetO<sup>-7</sup></i>                               | HM749 → AK47   | this work |
| <i>B. subtilis</i> 168CA AK575 | <i>trpC2 Δ(parA-parB)::neo tetR-gfp/tetO<sup>-7</sup> parS<sup>16</sup> arrays</i> | HM749 → AK97   | this work |
| <i>B. subtilis</i> 168CA AK577 | <i>trpC2 ΔparB gfp-parA::neo parS<sup>16</sup> arrays</i>                          | AK547 → AK150  | this work |
| <i>B. subtilis</i> 168CA AK585 | <i>trpC2 Δsoj Δspo0J tetR-yfp/tetO<sup>-150</sup></i>                              | HM194 → 168CA  | this work |
| <i>B. subtilis</i> 168CA AK587 | <i>trpC2 Δsoj Δspo0J tetR-yfp/tetO<sup>-150</sup> plasmid<sup>+parS</sup></i>      | pHM430 → AK585 | this work |
| <i>B. subtilis</i> 168CA AK589 | <i>trpC2 Δsoj Δspo0J tetR-yfp/tetO<sup>-150</sup> plasmid<sup>+parS</sup></i>      | pHM432 → AK585 | this work |
| <i>B. subtilis</i> PY79 AK591  | $\Delta 9parS^{+359} tetR-gfp/tetO^{-7}$                                           | pAK26 → AK521  | this work |
| <i>B. subtilis</i> PY79 AK593  | $\Delta 9parS^{+359} parB-gfp::neo$                                                | pAK82 → AK215  | this work |
| <i>B. subtilis</i> PY79 AK597  | $\Delta 9parS^{+270} parB-gfp::neo$                                                | pAK180 → AK369 | this work |
| <i>B. subtilis</i> PY79 AK599  | $\Delta 9parS^{+270} gfp-parA::neo$                                                | pAK180 → AK281 | this work |
| <i>B. subtilis</i> PY79 AK603  | $\Delta 9parS^{+270} soj-parB::neo$                                                | pAK180 → AK243 | this work |
| <i>B. subtilis</i> PY79 AK605  | $\Delta 9parS^{+270} \Delta parB::neo$                                             | pAK180 → AK245 | this work |
| <i>B. subtilis</i> PY79 AK607  | $\Delta 9parS^{+270} \Delta (parA-parB)::neo$                                      | pAK180 → AK563 | this work |
| <i>B. subtilis</i> PY79 AK615  | $\Delta 9parS^{+90} \Delta parB::neo tetR-gfp/tetO^{-7}$                           | pAK56 → AK209  | this work |
| <i>B. subtilis</i> PY79 AK617  | $\Delta 10parS \Delta parA::neo$                                                   | pAK101 → AK215 | this work |
| <i>B. subtilis</i> PY79 AK639  | $\Delta 9parS^{+359} \Delta parB::neo tetR-gfp/tetO^{-7}$                          | pAK28 → AK521  | this work |
| <i>B. subtilis</i> PY79 AK649  | $\Delta 9parS^{+270} \Delta parA::neo$                                             | pAK180 → AK617 | this work |
| <i>B. subtilis</i> PY79 AK667  | $\Delta 8parS^{+359} \Delta parA::neo$                                             | pHM160 → AK205 | this work |
| <i>B. subtilis</i> PY79 AK669  | $\Delta 9parS^{+359} \Delta parA::neo$                                             | AK213 → AK667  | this work |

|                                 |                                                                                 |                |           |
|---------------------------------|---------------------------------------------------------------------------------|----------------|-----------|
| <i>B. subtilis</i> PY79 AK673   | $\Delta 9parS^{+90} \Delta parA::neo tetR-gfp$                                  | AK171 → AK555  | this work |
| <i>B. subtilis</i> PY79 AK675   | $\Delta 10parS \Delta parA::neo tetR-gfp$                                       | AK171 → AK617  | this work |
| <i>B. subtilis</i> PY79 AK677   | $\Delta 9parS^{+359} \Delta parA::neo tetR-gfp$                                 | AK171 → AK669  | this work |
| <i>B. subtilis</i> PY79 AK683   | $\Delta 9parS^{+90} \Delta parA::neo tetR-gfp/tetO^{-7}$                        | AK171 → AK673  | this work |
| <i>B. subtilis</i> PY79 AK685   | $\Delta 10parS \Delta parA::neo tetR-gfp/tetO^{-7}$                             | AK171 → AK675  | this work |
| <i>B. subtilis</i> PY79 AK687   | $\Delta 9parS^{+359} \Delta parA::neo tetR-gfp/tetO^{-7}$                       | AK171 → AK677  | this work |
| <i>B. subtilis</i> PY79 BKM865  | $tetR-gfp/tetO^{-7}::cat$                                                       | -              | [4]       |
| <i>B. subtilis</i> PY79 BKM918  | $tetO^{-7}::ery$                                                                | -              | [4]       |
| <i>B. subtilis</i> PY79 BNS1657 | $\Delta 8parS$                                                                  | -              | [5]       |
| <i>B. subtilis</i> 168ED HM4    | $trpC2 gfp-parA::neo$                                                           | -              | [6]       |
| <i>B. subtilis</i> 168ED HM13   | $trpC2 \Delta parB gfp-parA::neo$                                               | -              | [6]       |
| <i>B. subtilis</i> 168ED HM34   | $trpC2 parA-parB::neo$                                                          | -              | [6]       |
| <i>B. subtilis</i> 168ED HM61   | $trpC2 parB-gfp::neo$                                                           | -              | [7]       |
| <i>B. subtilis</i> 168ED HM130  | $trpC2 (spo0J tetO^{-150})::neo cgeD::(P_{pen-tetR-yfp}) tet$                   | -              | [6]       |
| <i>B. subtilis</i> 168ED HM168  | $trpC2 (\Delta spo0J tetO^{-150})::neo cgeD::(P_{pen-tetR-yfp}) tet$            | -              | [6]       |
| <i>B. subtilis</i> 168ED HM171  | $trpC2 (\Delta soj tetO^{-150})::neo cgeD::(P_{pen-tetR-yfp}) tet$              | -              | [6]       |
| <i>B. subtilis</i> 168ED HM183  | $trpC2 \Delta (parA-parB)::neo$                                                 | -              | [6]       |
| <i>B. subtilis</i> 168ED HM194  | $trpC2 (\Delta soj \Delta spo0J tetO^{-150})::neo cgeD::(P_{pen-tetR-yfp}) tet$ | -              | [6]       |
| <i>B. subtilis</i> 168ED HM226  | $trpC2 pheA \Delta parB::neo$                                                   | -              | [6]       |
| <i>B. subtilis</i> 168ED HM227  | $trpC2 pheA \Delta parA::neo$                                                   | -              | [6]       |
| <i>B. subtilis</i> 168CA HM740  | $trpC2 gfp-parA::neo$                                                           | HM4 → 168CA    | this work |
| <i>B. subtilis</i> 168CA HM747  | $trpC2 parA-parB::neo$                                                          | HM34 → 168CA   | this work |
| <i>B. subtilis</i> 168CA HM748  | $trpC2 \Delta parA::neo$                                                        | HM227 → 168CA  | this work |
| <i>B. subtilis</i> 168CA HM749  | $trpC2 \Delta (parA-parB)::neo$                                                 | HM183 → 168CA  | this work |
| <i>B. subtilis</i> 168CA HM754  | $trpC2 \Delta parB::neo$                                                        | HM226 → 168CA  | this work |
| <i>B. subtilis</i> 168CA HM756  | $trpC2 parB-gfp::neo$                                                           | HM61 → 168CA   | this work |
| <i>B. subtilis</i> 168CA HM765  | $trpC2 parA-parB::neo tetR-gfp/tetO^{-7}$                                       | HM747 → AK47   | this work |
| <i>B. subtilis</i> 168CA HM766  | $trpC2 \Delta parA::neo tetR-gfp/tetO^{-7}$                                     | HM748 → AK47   | this work |
| <i>B. subtilis</i> 168CA HM821  | $trpC2 spo0J-gfp::neo plasmid^{parS}$                                           | pHM430 → HM756 | this work |
| <i>B. subtilis</i> 168CA HM823  | $trpC2 spo0J-gfp::neo plasmid^{+parS}$                                          | pHM432 → HM756 | this work |
| <i>B. subtilis</i> 168CA HM831  | $trpC2 \Delta spo0J tetR-yfp/tetO^{-150}$                                       | HM168 → 168CA  | this work |
| <i>B. subtilis</i> 168CA HM832  | $trpC2 \Delta soj tetR-yfp/tetO^{-150}$                                         | HM171 → 168CA  | this work |
| <i>B. subtilis</i> 168CA HM834  | $trpC2 \Delta spo0J tetR-yfp/tetO^{-150} plasmid^{parS}$                        | pHM430 → HM831 | this work |
| <i>B. subtilis</i> 168CA HM835  | $trpC2 \Delta soj tetR-yfp/tetO^{-150} plasmid^{parS}$                          | pHM430 → HM832 | this work |
| <i>B. subtilis</i> 168CA HM837  | $trpC2 \Delta spo0J tetR-yfp/tetO^{-150} plasmid^{+parS}$                       | pHM432 → HM831 | this work |
| <i>B. subtilis</i> 168CA HM838  | $trpC2 \Delta soj tetR-yfp/tetO^{-150} plasmid^{+parS}$                         | pHM432 → HM832 | this work |
| <i>B. subtilis</i> 168CA HM853  | $trpC2 tetR-yfp/tetO^{-150}$                                                    | HM130 → 168CA  | this work |
| <i>B. subtilis</i> 168CA HM855  | $trpC2 tetR-yfp/tetO^{-150} plasmid^{parS}$                                     | pHM430 → HM853 | this work |

|                                |                                                                   |                |           |
|--------------------------------|-------------------------------------------------------------------|----------------|-----------|
| <i>B. subtilis</i> 168CA HM856 | <i>trpC2 tetR-yfp/tetO<sup>-150</sup> plasmid<sup>+parS</sup></i> | pHM432 → HM853 | this work |
| <i>B. subtilis</i> 168CA HM870 | <i>trpC2 gfp-soj::neo plasmid<sup>+parS</sup></i>                 | pHM430 → HM740 | this work |
| <i>B. subtilis</i> 168CA HM871 | <i>trpC2 gfp-soj::neo plasmid<sup>+parS</sup></i>                 | pHM432 → HM740 | this work |
| <i>B. subtilis</i> 168CA HM907 | <i>trpC2 ΔparB::neo tetR-gfp/tetO<sup>-7</sup></i>                | HM754 → AK47   | this work |
| <i>B. subtilis</i> JH642 PSL23 | <i>trpC2 Δ6parS parB-gfp cotS::parS<sup>16</sup> array cat</i>    | -              | [8]       |
| <i>B. subtilis</i> JH642 PSL25 | <i>trpC2 Δ6parS parB-gfp yheH::parS<sup>16</sup> array cat</i>    | -              | [8]       |
| <i>B. subtilis</i> PY79        | wild type prototroph                                              | -              | [9]       |

<sup>a</sup> *B. subtilis* antibiotic resistance markers are listed respectively. *neo*, kanamycin resistance; *ery*, erythromycin resistance; *cat*, chloramphenicol resistance; *spc*, spectinomycin resistance; *tet*, tetracycline resistance.

<sup>b</sup> Plasmids or genomic DNA of the indicated strain transformed into the parent strain used in the genetic construction.

<sup>c</sup> DNA fragments amplified from AK47 gDNA using primer pairs oAK5/oAK6 and oAK7/oAK8.

CONFIDENTIAL

## Supplementary Table 2: Plasmids used in this study

| Plasmid             | Genotype <sup>a</sup>                                | Construction <sup>b</sup>       | Source    |
|---------------------|------------------------------------------------------|---------------------------------|-----------|
| pAK09               | <i>bla cat 'sigX ΔparS<sup>206</sup>::zeo resE'</i>  | -                               | [3]       |
| pAK23               | <i>bla cat 'yhaX ΔparS<sup>90</sup>::tet hemZ'</i>   | -                               | [3]       |
| pAK26               | <i>bla cat parB::neo</i>                             | -                               | [3]       |
| pAK28               | <i>bla cat ΔparB::neo</i>                            | -                               | [3]       |
| pAK30               | <i>bla cat ΔparB ΔparS<sup>359</sup>::neo</i>        | pHM456 (oAK55/oGJS431) → pHM23  | this work |
| pAK32               | <i>bla cat parB ΔparS<sup>359</sup>::neo</i>         | -                               | [3]       |
| pAK48               | <i>bla cat gfp-parA ΔparS<sup>359</sup>::neo</i>     | pHM142 (oAK52/oAK53) → pHM23    | this work |
| pAK56               | <i>bla cat 'yhaX parS<sup>90</sup>::tet hemZ'</i>    | pHM48 (oAK61/oAK62) → pAK23     | this work |
| pAK82 <sup>c</sup>  | <i>bla cat parB-gfp::neo</i>                         | pHM110 → pAK26                  | this work |
| pAK83 <sup>c</sup>  | <i>bla cat parB-gfp ΔparS<sup>359</sup>::neo</i>     | pHM110 → pAK32                  | this work |
| pAK98               | <i>bla cat ΔparA::neo</i>                            | pHM160 (oAK58/oHM20) → pAK26    | this work |
| pAK99               | <i>bla cat Δ(parA-parB)::neo</i>                     | pHM160 (oAK58/oHM20) → pAK28    | this work |
| pAK100              | <i>bla cat Δ(parA-parB ΔparS<sup>359</sup>)::neo</i> | pHM160 (oAK58/oHM20) → pAK30    | this work |
| pAK101              | <i>bla cat ΔparA ΔparS<sup>359</sup>::neo</i>        | pHM160 (oAK58/oHM20) → pAK32    | this work |
| pAK128              | <i>bla cat 'ytcC::zeo</i>                            | 160CA (oAK191/oAK192) → pHM457  | this work |
| pAK130              | <i>bla cat zeo ytxO'</i>                             | 160CA (oAK189/oAK190) → pHM457  | this work |
| pAK136 <sup>c</sup> | <i>bla cat 'ytcC::zeo ytxO'</i>                      | pAK130 → pAK128                 | this work |
| pAK178              | <i>bla cat 'ytcC::erm ytxO'</i>                      | pHM432 (oAK227/oAK257) → pAK136 | this work |
| pAK180              | <i>bla cat 'ytcC::erm parS<sup>270</sup> ytxO'</i>   | pHM48 (oAK216/oAK217) → pAK178  | this work |
| pcat::tet           | <i>bla cat::tet</i>                                  | -                               | [10]      |
| pHM23               | <i>bla cat gfp-parA::neo</i>                         | -                               | [6]       |
| pHM48               | <i>bla cat parB::neo</i>                             | -                               | [6]       |
| pHM52               | <i>bla cat ΔparB::neo</i>                            | -                               | [6]       |
| pHM59               | <i>bla cat Δ(parA-parB)::tet</i>                     | -                               | [6]       |
| pHM110              | <i>bla cat parB-gfp::neo</i>                         | -                               | [7]       |
| pHM142              | <i>bla cat parB ΔparS<sup>359</sup>::neo</i>         | -                               | [3]       |
| pHM160              | <i>bla cat ΔparA::neo</i>                            | -                               | [6]       |
| pHM430              | <i>ery</i>                                           | pNZ8907                         | [11]      |
| pHM432              | <i>ery 'spo0J-parS-spo0J'</i>                        | 168CA (oAK61/oAK62) → pHM430    | this work |
| pHM456 <sup>c</sup> | <i>bla cat ΔparB ΔparS<sup>359</sup>::neo</i>        | pHM142 → pHM52                  | this work |
| pHM457              | <i>bla cat zeo</i>                                   | -                               | [3]       |

<sup>a</sup> *E. coli* and *B. subtilis* antibiotic resistance markers are listed first and second respectively. *bla*, ampicillin resistance; *kan*, kanamycin resistance; *ery*, erythromycin resistance; *cat*, chloramphenicol resistance; *spc*, spectinomycin resistance; *tet*, tetracycline resistance; *phl*, phleomycin resistance; zeomycin resistance; *zeo*.

<sup>b</sup> DNA fragments amplified with primer pair indicated in parentheses using template from either plasmids or genomic DNA indicated in parentheses before the amplified products are cloned into the parent plasmid used in the genetic construction.

<sup>c</sup> DNA fragments are digested by restriction enzymes and cloned into the parent plasmid used in the genetic construction.

### Supplementary Table 3: Oligonucleotides used in this study

| Primer  | Sequence (5'→3')                                    |
|---------|-----------------------------------------------------|
| oAK52   | AAGGGAAGGGCCGCGGTCAAGAGGTGCGGAAGTATATTTAG           |
| oAK53   | AAGGGAAGGGTCTAGAAGTGTGGATCCCCCGGGCTGC               |
| oAK55   | AATTTAATTTCTAGGTAAGGAAAATCATAGCAATTACGAAC           |
| oAK58   | TTTATGCTTCCGGCTCGTATG                               |
| oAK61   | AATTTAATTTGCGGCCGCGACTGCTGACACTGCCAG                |
| oAK62   | AATTTAATTTGCGGCCGCCATTTATGATTCTCGTTCAGAC            |
| oAK91   | AATTTAATTTGAGCTCGCGTTCTCTAATTTACAAGAGG              |
| oAK92   | GATTGGAATACGGATTCTG                                 |
| oAK189  | AAGGGAATTCTCGAGGTGACTTTATGCCTTGCGCTTTAC             |
| oAK190  | AAGGGAATTGGTACCGCCTCTATTTCTAAACTGGATCTCGAC          |
| oAK216  | AAGGGAATTTCTAGAGACTGCTGACACTGCC                     |
| oAK217  | AAGGGAATTTCTAGACATTTATGATTCTCGTTCAGAC               |
| oAK227  | AAGGGAATTGGATCCGACTCATAGAATTATTTCTCCCG              |
| oAK257  | AATTTAATTTCTCGAGTATCACGAGGCCCTTTCGTCTTCAAGAATTGATCC |
| oGJS431 | GGTGGTCCCGCGGCATCTTCGTTTGAAAGATGC GGC               |
| oHM20   | TTTTCTTGGCTGATAAGGATTAGGGCGTAAATCG                  |

## Supplementary Table 4: Strains used in each figures

- Fig.1 HM756 (*parB-gfp*), AK153 (*parB-gfp parS<sup>16</sup>* arrays)
- Fig. 2 HM821 (*parB-gfp plasmid<sup>parS</sup>*), HM823 (*parB-gfp plasmid<sup>+parS</sup>*)
- Fig. 3 HM765 (*tetR-gfp/tetO<sup>-7</sup>*), AK87 (*tetR-gfp/tetO<sup>-7</sup> parS<sup>16</sup>* arrays), HM907 (*tetR-gfp/tetO<sup>-7</sup> ΔparB*), AK123 (*tetR-gfp/tetO<sup>-7</sup> parS<sup>16</sup>* arrays  $\Delta$ *parB*), HM766 (*tetR-gfp/tetO<sup>-7</sup> ΔparA*), AK89 (*tetR-gfp/tetO<sup>-7</sup> parS<sup>16</sup>* arrays  $\Delta$ *parA*)
- Fig. 4 HM855 (*tetR-yfp/tetO<sup>-7</sup> plasmid<sup>parS</sup>*), HM856 (*tetR-yfp/tetO<sup>-7</sup> plasmid<sup>+parS</sup>*), HM834 ( $\Delta$ *parB tetR-yfp/tetO<sup>-7</sup> plasmid<sup>parS</sup>*), HM837 ( $\Delta$ *parB tetR-yfp/tetO<sup>-7</sup> plasmid<sup>+parS</sup>*), HM835 ( $\Delta$ *parA tetR-yfp/tetO<sup>-7</sup> plasmid<sup>parS</sup>*), HM838 ( $\Delta$ *parA tetR-yfp/tetO<sup>-7</sup> plasmid<sup>+parS</sup>*)
- Fig. 5 HM765 (*tetR-gfp/tetO<sup>-7</sup>*), AK87 (*tetR-gfp/tetO<sup>-7</sup> parS<sup>16</sup>* arrays), HM907 (*tetR-gfp/tetO<sup>-7</sup> ΔparB*), AK123 (*tetR-gfp/tetO<sup>-7</sup> parS<sup>16</sup>* arrays  $\Delta$ *parB*), AK573 (*tetR-gfp/tetO<sup>-7</sup> ΔparA ΔparB*), AK575 (*tetR-gfp/tetO<sup>-7</sup> parS<sup>16</sup>* arrays  $\Delta$ *parA ΔparB*), HM766 (*tetR-gfp/tetO<sup>-7</sup> ΔparA*), AK89 (*tetR-gfp/tetO<sup>-7</sup> parS<sup>16</sup>* arrays  $\Delta$ *parA*), HM740 (*gfp-parA*), AK199 (*gfp-parA parS<sup>16</sup>* arrays), AK547 (*gfp-parA ΔparB*), AK577 (*gfp-parA ΔparB parS<sup>16</sup>* arrays), HM855 (*tetR-yfp/tetO<sup>-7</sup> plasmid<sup>parS</sup>*), HM856 (*tetR-yfp/tetO<sup>-7</sup> plasmid<sup>+parS</sup>*), HM834 ( $\Delta$ *spo0J tetR-yfp/tetO<sup>-7</sup> plasmid<sup>parS</sup>*), HM837 ( $\Delta$ *spo0J tetR-yfp/tetO<sup>-7</sup> plasmid<sup>+parS</sup>*), AK587 ( $\Delta$ *soj Δspo0J tetR-yfp/tetO<sup>-7</sup> plasmid<sup>parS</sup>*), AK589 ( $\Delta$ *soj Δspo0J tetR-yfp/tetO<sup>-7</sup> plasmid<sup>+parS</sup>*), HM835 ( $\Delta$ *soj tetR-yfp/tetO<sup>-7</sup> plasmid<sup>parS</sup>*), HM838 ( $\Delta$ *soj tetR-yfp/tetO<sup>-7</sup> plasmid<sup>+parS</sup>*), HM870 (*gfp-soj plasmid<sup>parS</sup>*), HM871 (*gfp-soj plasmid<sup>+parS</sup>*), AK569 ( $\Delta$ *spo0J gfp-soj plasmid<sup>parS</sup>*), AK571 ( $\Delta$ *spo0J gfp-soj plasmid<sup>+parS</sup>*).
- Fig. 6 AK367 (*parB-gfp*), AK369 (*parB-gfp Δ10parS*), AK593 (*parB-gfp Δ9parS<sup>+359</sup>*), AK597 (*parB-gfp Δ9parS<sup>+270</sup>*), AK373 (*parB-gfp Δ9parS<sup>+90</sup>*), AK239 (wild type), AK243 ( $\Delta$ *10parS*), AK259 ( $\Delta$ *9parS<sup>+359</sup>*), AK603 ( $\Delta$ *9parS<sup>+270</sup>*), AK323 ( $\Delta$ *9parS<sup>+90</sup>*), AK241 ( $\Delta$ *parB*), AK245 ( $\Delta$ *parB Δ10parS*), AK261 ( $\Delta$ *parB Δ9parS<sup>+359</sup>*), AK605 ( $\Delta$ *parB Δ9parS<sup>+270</sup>*), AK325 ( $\Delta$ *parB Δ9parS<sup>+90</sup>*), AK559 ( $\Delta$ *parA ΔparB*), AK563 ( $\Delta$ *parA ΔparB Δ10parS*), AK561 ( $\Delta$ *parA ΔparB Δ9parS<sup>+359</sup>*), AK607 ( $\Delta$ *parA ΔparB Δ9parS<sup>+270</sup>*), AK553 ( $\Delta$ *parA ΔparB Δ9parS<sup>+90</sup>*), AK557 ( $\Delta$ *parA*), AK617 ( $\Delta$ *parA Δ10parS*), AK669 ( $\Delta$ *parA Δ9parS<sup>+359</sup>*), AK649 ( $\Delta$ *parA Δ9parS<sup>+270</sup>*), AK555 ( $\Delta$ *parA Δ9parS<sup>+90</sup>*), AK277 (*gfp-parA*), AK281 (*gfp-parA Δ10parS*), AK305 (*gfp-parA Δ9parS<sup>+359</sup>*), AK599 (*gfp-parA Δ9parS<sup>+270</sup>*), AK399 (*gfp-parA Δ9parS<sup>+90</sup>*)

Fig. S1 HM756 (*parB-gfp*), AK153 (*parB-gfp parS<sup>16</sup>* arrays), HM821 (*parB-gfp plasmid<sup>parS</sup>*), HM823 (*parB-gfp plasmid<sup>+parS</sup>*), HM765 (*tetR-gfp/tetO<sup>-7</sup>*), AK87 (*tetR-gfp/tetO<sup>-7</sup> parS<sup>16</sup>* arrays), HM855 (*tetR-yfp/tetO<sup>-7</sup> plasmid<sup>parS</sup>*), HM856 (*tetR-yfp/tetO<sup>-7</sup> plasmid<sup>+parS</sup>*)

Fig. S2 AK239 (wild type), AK243 ( $\Delta 10parS$ ), AK259 ( $\Delta 9parS^{359+}$ ), AK603 ( $\Delta 9parS^{270+}$ ), AK323 ( $\Delta 9parS^{90+}$ )

Fig. S3 AK181 (*tetR-gfp/tetO<sup>-7</sup>*), AK225 (*tetR-gfp/tetO<sup>-7</sup>  $\Delta 10parS$* ), AK591 (*tetR-gfp/tetO<sup>-7</sup>  $\Delta 9parS^{359+}$* ), AK405 (*tetR-gfp/tetO<sup>-7</sup>  $\Delta 9parS^{90+}$* ), AK183 (*tetR-gfp/tetO<sup>-7</sup>  $\Delta parB$* ), AK227 (*tetR-gfp/tetO<sup>-7</sup>  $\Delta parB$   $\Delta 10parS$* ), AK639 (*tetR-gfp/tetO<sup>-7</sup>  $\Delta parB$   $\Delta 9parS^{359+}$* ), AK615 (*tetR-gfp/tetO<sup>-7</sup>  $\Delta parB$   $\Delta 9parS^{90+}$* ), AK187 (*tetR-gfp/tetO<sup>-7</sup>  $\Delta parA$* ), AK685 (*tetR-gfp/tetO<sup>-7</sup>  $\Delta parA$   $\Delta 10parS$* ), AK687 (*tetR-gfp/tetO<sup>-7</sup>  $\Delta parA$   $\Delta 9parS^{359+}$* ), AK683 (*tetR-gfp/tetO<sup>-7</sup>  $\Delta parA$   $\Delta 9parS^{90+}$* )

CONFIDENTIAL

## References

1. **Kunst F, Ogasawara N, Moszer I, Albertini AM, Alloni G et al.** The complete genome sequence of the Gram-positive bacterium *Bacillus subtilis*. *Nature* 1997;390(6657):249-256.
2. **Murray H, Koh A.** Multiple Regulatory Systems Coordinate DNA Replication with Cell Growth in *Bacillus subtilis*. *PLoS Genet* 2014;10(10):e1004731.
3. **Marbouty M, Le Gall A, Cattoni DI, Cournac A, Koh A et al.** Condensin- and Replication-Mediated Bacterial Chromosome Folding and Origin Condensation Revealed by Hi-C and Super-resolution Imaging. *Mol Cell* 2015;59(4):588-602.
4. **Wagner JK, Marquis KA, Rudner DZ.** SirA enforces diploidy by inhibiting the replication initiator DnaA during spore formation in *Bacillus subtilis*. *Mol Microbiol* 2009;73(5):963-974.
5. **Sullivan NL, Marquis KA, Rudner DZ.** Recruitment of SMC by ParB-parS Organizes the Origin Region and Promotes Efficient Chromosome Segregation. *Cell* 2009;137(4):697-707.
6. **Murray H, Errington J.** Dynamic Control of the DNA Replication Initiation Protein DnaA by Soj/ParA. *Cell* 2008;135(1):74-84.
7. **Leaver M, Dominguez-Cuevas P, Coxhead JM, Daniel RA, Errington J.** Life without a wall or division machine in *Bacillus subtilis*. *Nature* 2009;457(7231):849-853.
8. **Lee PS, Lin DCH, Moriya S, Grossman AD.** Effects of the chromosome partitioning protein Spo0J (ParB) on oriC positioning and replication initiation in *Bacillus subtilis*. *Journal of Bacteriology* 2003;185(4):1326-1337.
9. **Youngman PJ, Perkins JB, Losick R.** Genetic Transposition and Insertional Mutagenesis in *Bacillus-Subtilis* with *Streptococcus-Faecalis* Transposon Tn917. *Proceedings of the National Academy of Sciences of the United States of America-Biological Sciences* 1983;80(8):2305-2309.
10. **Steinmetz M, Richter R.** Plasmids Designed to Alter the Antibiotic-Resistance Expressed by Insertion Mutations in *Bacillus-Subtilis*, through in-Vivo Recombination. *Gene* 1994;142(1):79-83.
11. **Bongers RS, Veening JW, Van Wieringen M, Kuipers OP, Kleerebezem M.** Development and characterization of a subtilin-regulated expression system in *Bacillus subtilis*: strict control of gene expression by addition of subtilin. *Appl Environ Microbiol* 2005;71(12):8818-8824.
